# Supplementary material for: Classification of Five Uremic Solutes according to Their Effects on Renal Tubular Cells
Source: Hindawi journal article supplement (doi:10.1155/2014/512178), 2014-01-01
Supplement: f1 [file 512178.f1.pdf]

Suppl. Fig. 1

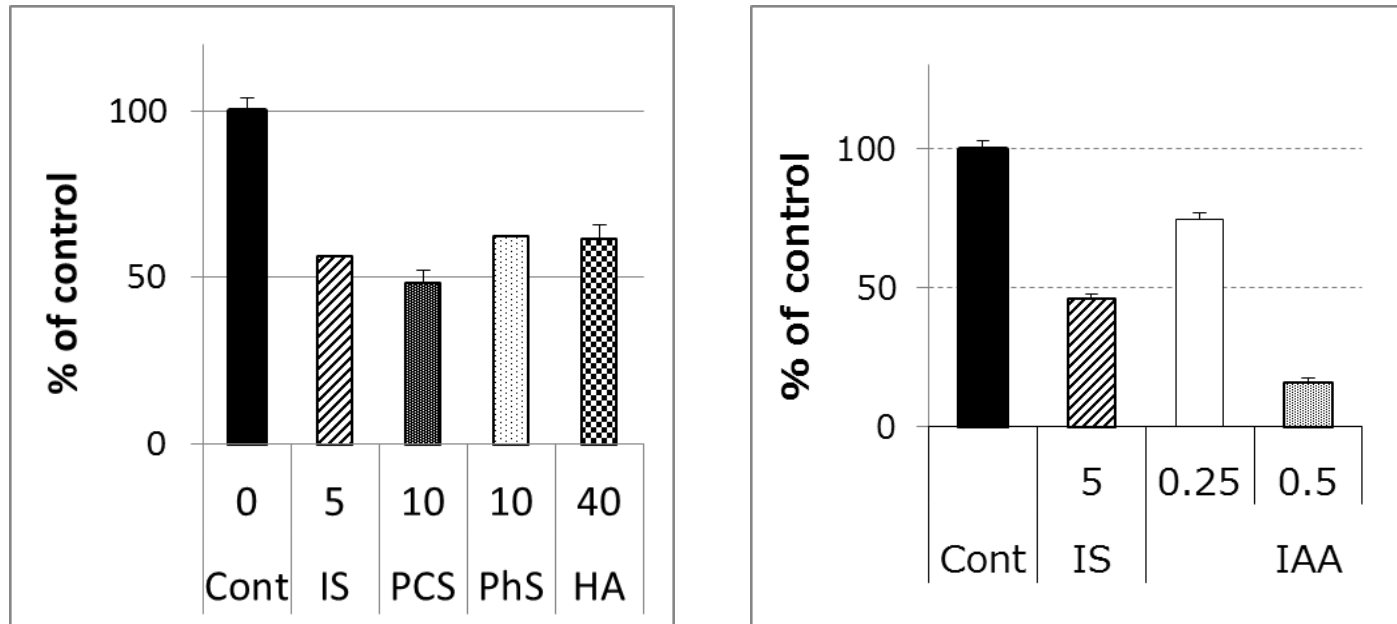

Showing the results of viable cell counts that were concurrently evaluated during the cell cycle analysis after synchronization at G1/S boundary.

Suppl. Fig. 2

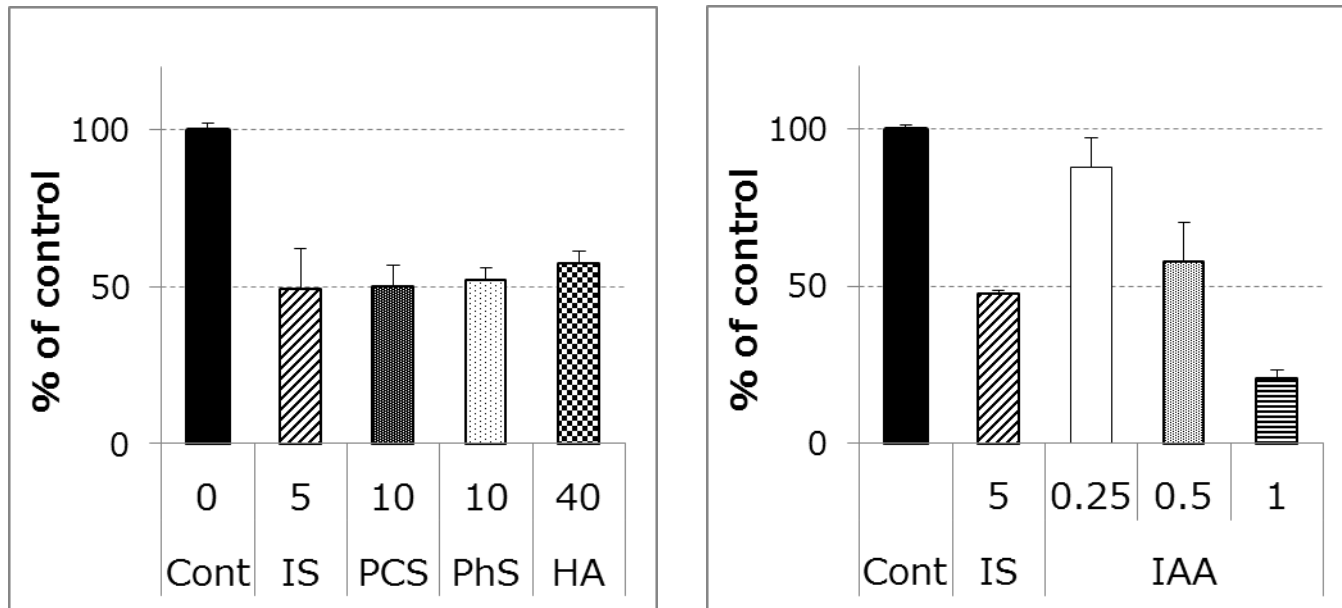

Showing the results of viable cell counts that were concurrently evaluated during the cell cycle analysis after synchronization at G2/M boundary.

Suppl. Fig. 3

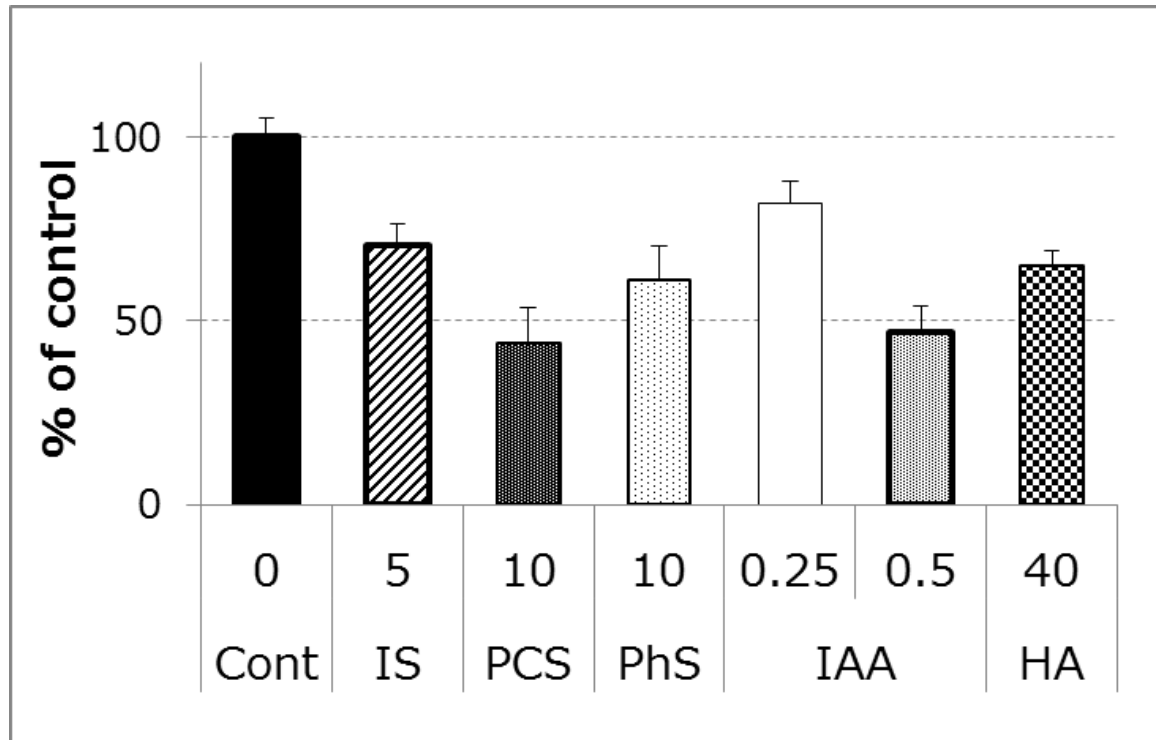

Showing the results of viable cell counts that were concurrently evaluated during the evaluation of cell death.

Suppl. Fig. 4

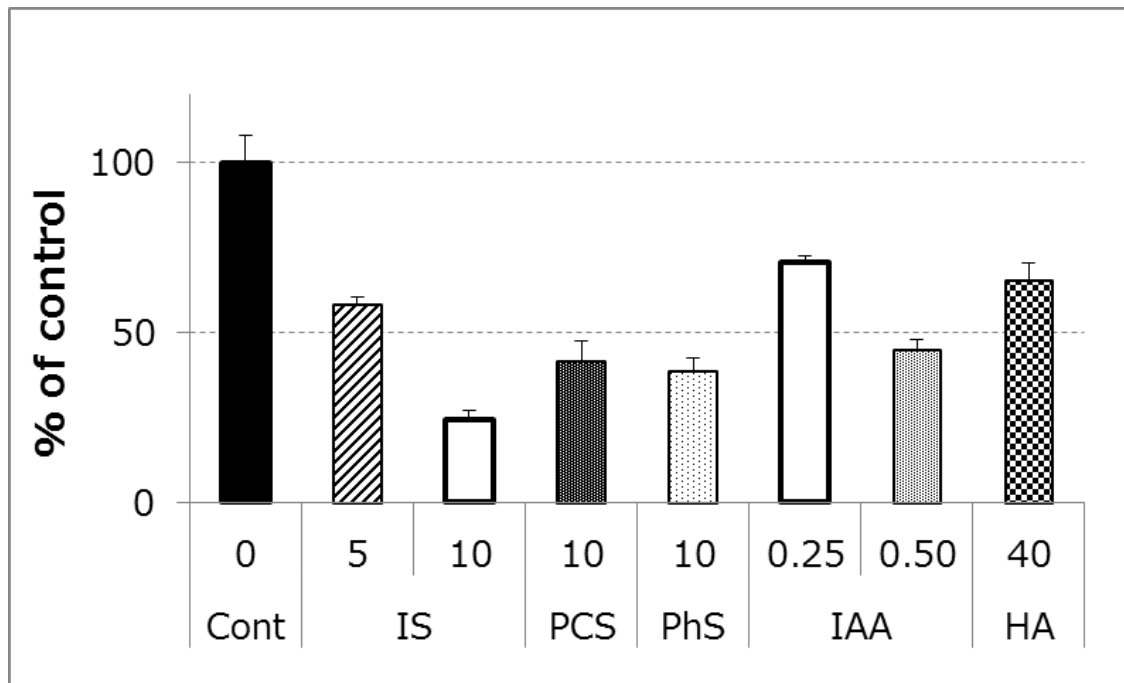

Showing the results of viable cell counts that were concurrently evaluated during Western blotting analyses (p53 & Chk1).

Suppl. Fig. 5

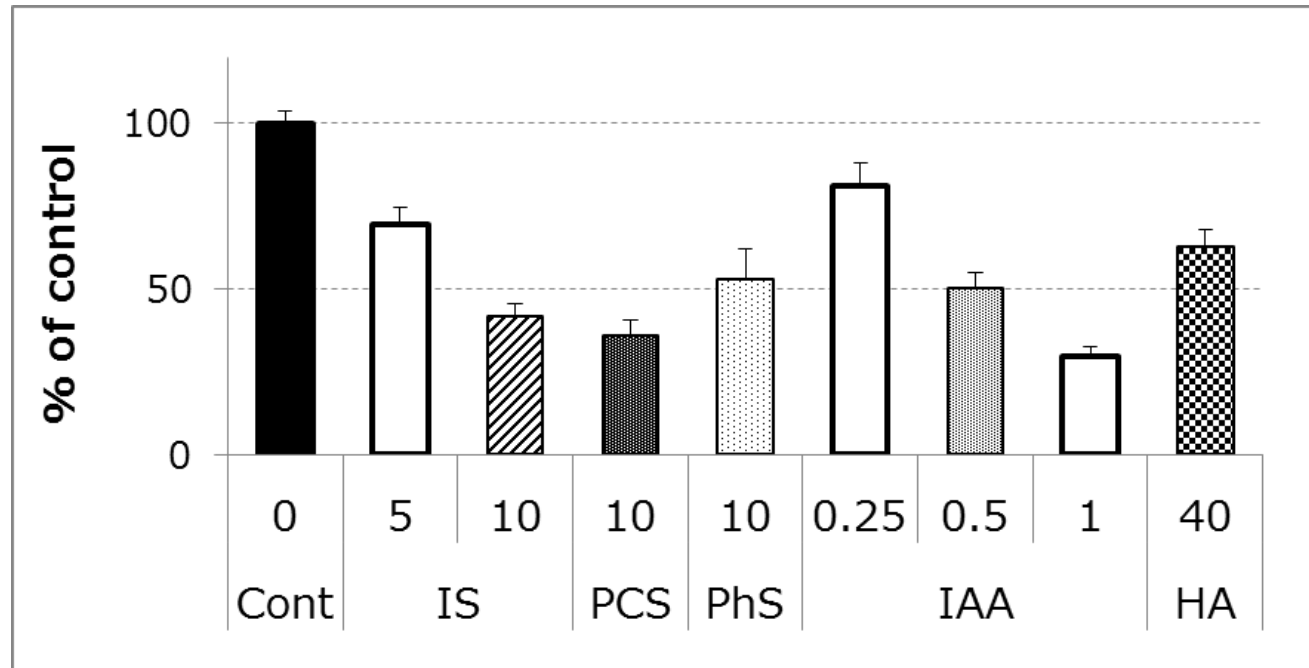

Showing the results of viable cell counts that were concurrently evaluated during real-time PCR analyses.
